# Supplementary material
Source: publisher figshare collection journal article supplement (https://diabetesjournals.figshare.com/ndownloader/files/28174395)
Supplement: Supplementary file 1 [file 28174395]

# **Online-only Supplemental Material Files**

## **MATERIALS**

### **Study protocol**

Following the diagnosis of TTS, patients were divided into hyperglycemics vs. normoglycemics according to admission blood glucose values ( $\geq 140$  mg/dl,  $\geq 7.8$  mmol/l) (1). For each patient, demographic and baseline clinical data were collected, including age, sex, anthropometric data, cardiovascular risk factors, co-morbidities and medical therapy. All enrolled patients underwent a standard 12-lead EKG, transthoracic echocardiography, laboratory tests (complete blood count, electrolytes, creatinine, glucose, and markers of myocardial necrosis). Sympathetic system activity was assayed by peripheral blood of norepinephrine levels determination and cardiac MIBG scintigraphy, which was performed in a subset of 30 patients who did not present any contraindication to complete the exam. All patients were treated during hospitalization according to the current ESC Position Paper (2). At hospital discharge, patients were managed and followed for 24 months after the acute event as outpatients. Physicians involved in the study protocol reviewed at clinical visits at the 12th and 24th months of follow-up the clinical events in terms of hospitalizations for HF worsening and all-cause of deaths.

### **Diagnostic criteria for Stressfull events**

In TTS patients, we distinguished the Stressfull Events in emotional and physical stressors (3). The emotional stressors were triggering factors caused by traumatic emotions, panic, fear, anger and anxiety. In this class of stressors we included also those caused by financial or employment problems, and by embarrassment (3). Conversely, we defined physical stressors the triggers linked to physical activities, medical conditions, surgical interventions, pregnancy, alcohol consumption, cocaine or opiate withdrawal (3). The abuse of sympato-mimetic drugs and the nervous system conditions that could trigger the acute onset of TTS were also considered in this group (3).

## **Treatments for hyperglycemia**

For patients with blood glucose levels > 180 mg/dl at hospital admission, we started the continuous infusion of 50 IU regular insulin in 50 mL NaCl (0.9% using a Perfusor pump). This therapy was adjusted to keep blood glucose between 140 and 180 mg/dl. Thus, when blood glucose fell to < 140 mg/dl, insulin infusion was tapered and eventually stopped. After the start of the insulin infusion protocol, glycemic control was provided every hour to obtain three consecutive values within the goal range. The infusion lasted until stable normoglycemia and at least for 24 h, and was followed by subcutaneous insulin-based long-term glucose control. Insulin was administered as short-acting insulin before meals and long-acting insulin in the evening with a treatment goal of fasting blood glucose 90 to 126 mg/dl and non-fasting glucose < 180 mg/dl. The above-mentioned subcutaneous insulin protocol was used in diabetic and hyperglycemic patients with blood glucose levels range from 140-180 mg/dl. Among patients with previously known diabetes, oral anti-diabetic drugs - metformin, sulfonylureas, dipeptidyl peptidase 4 inhibitors, sodium-glucose cotransporter 2 inhibitors, and glucagon-like peptide 1 agonists – were stopped at admission. After discharge, all type 2 diabetics patients were treated by Mediterranean diet, essentially plant-based dietary pattern whose greater consumption has been associated with a better metabolic control and higher survival for all-cause mortality (4)

## **Coronary angiography**

Hospital admission physicians thoroughly trained in interventional cardiology, blinded to the study protocol and glucose blood values, performed a coronary angiography in all enrolled patients by radiographic projections with at least two orthogonal views (5). For each enrolled patient, the angiographic left ventriculograms via the left heart catheterization were also evaluated, using a biplane imaging with right anterior oblique (RAO) and left anterior oblique (LAO) projections (5-6).

### **Transthoracic echocardiography**

At hospital admission and discharge, cardiologists fully trained and experienced in echocardiography, blinded to the study protocol and glucose blood values of enrolled patients, performed two-dimensional echocardiography (Philips IE 33 or EPIQ) according to the European Association of Cardiovascular Imaging Guidelines (7). The operators assessed LV wall contractility throughout the echocardiography score (wall motion score index) using the 17<sup>th</sup> segments classification recommended by the European Association of Cardiovascular Imaging Guidelines (7). To date, the wall motion score index has been used as a semi-quantitative analysis of regional systolic function and to report the precise distribution of the RWMA in patients with TTS (7). However, for each analyzed LV segment, the authors assigned a score based on its motion and systolic thickening via multiple views of the LV wall. Thus, we used a 5-level score defined as follows: score 1=normokinesis or hyperkinesis; score 2=hypokinesis; score 3=akinesis; score 4=dyskinesis; score 5=aneurysm (5-6). Therefore, we derived RWMSI as the sum of all scores divided by the number of LV segments visualized (5,7).

### **Serum biomarkers analysis**

At baseline and for all follow-up duration (12 and 24 months), authors determined the baseline laboratory studies by peripheral blood and enzymatic assays after an overnight fast [glycated hemoglobin 1Ac type (HbA1c) and B type natriuretic peptide (BNP)]. Moreover, inflammatory markers (tumor necrosis factor- $\alpha$  - TNF- $\alpha$ , C reactive protein - CRP, white blood cells - leukocytes and neutrophils count) were measured at baseline and during follow-up (5,8). Finally, for the evaluation of sympathetic tone activity at hospital admission, at hospital discharge, and after 12 and 24 months of follow-up, we measured plasma levels of norepinephrine by high-performance liquid chromatography (5).

## MIBG scintigraphy

MIBG myocardial scintigraphy was performed according to the standard protocol at the time of hospitalization and during follow-up (12 and 24 months) to visualize cardiac sympathetic nerve activity in patients with TTS (5,9). Utilizing <sup>123</sup>I-MIBG, a norepinephrine analogous, the late heart-to-mediastinum ratio (H/M<sub>late</sub>) and washout rate (WR) were calculated. The H/M<sub>late</sub> is an index of global neuronal function due to norepinephrine uptake, while the WR reflects the sympathetic tone. Drugs interfering with <sup>123</sup>I-MIBG uptake were withheld, and the thyroid uptake of unbound <sup>123</sup>I was blocked with 500 mg of potassium perchlorate given orally 30 min before <sup>123</sup>I-MIBG injection (5). However, intravenously at rest, the dose ranging from 148 MBq to 370 MBq of <sup>123</sup>I-MIBG was injected. Both planar and SPECT images were acquired 15 min after injection (early) and 4 h after injection (delayed, by the use of a dual-head gamma camera - ECAM Siemens, Erlangen, Germany) equipped with a low-energy, high-resolution collimator. A 20% window was usually centered over the 159-keV photo peak of <sup>123</sup>I for imaging. Anterior planar images of the chest for global assessment of cardiac innervation were acquired using a 256x256 matrix. Then, the SPECT images, allowed for regional evaluation, were acquired using a 64x64 matrix over 180°, from the right anterior oblique position to the left posterior diagonal position. From this imaging, the authors performed quantitative evaluations with a standard protocol as previously described (5). However, we evaluated at baseline and 2 years of follow-up the H/M<sub>late</sub> and WR in the study cohorts.

The formula to calculate WR was: 
$$WR_{BKG\ corrected} = \frac{(He-Me) - [(Hl-Ml) \times 1.21]}{(He-Me)}$$

The BKG is background; H is heart mean counts per pixel; M is mediastinum mean counts per pixel; "e" is early; "l" is late; and 1.21 is the correction factor for <sup>123</sup>I decay at 3 h and 45 min (10).

### **Follow up and study endpoints**

HF at hospital admission, discharge, and after 2 years of follow-up were evaluated (11). For each enrolled patient, the following parameters were considered at follow-up evaluations: i) the New York Heart Association (NYHA) class, patient's overall condition as unchanged or slightly, moderately, or markedly worsened, or improved since enrollment by global self-assessment (11); ii) medical events or symptoms suggestive of HF (asthenia, dyspnea, weight increase, increased diuretic dose). Pre-specified endpoints were all-cause mortality and heart failure. Heart failure was diagnosed according to the current ESC guidelines (12). Finally, we also evaluated: i) values of inflammatory markers/cells and BNP at baseline, at 12 and 24 months of follow-up; ii) the levels of circulating norepinephrine at baseline, at 12 and 24 months of follow-up; iii) MIBG with the H/M<sub>late</sub>, and WR at baseline, at 12 and 24 months of follow-up.

### **Sample size calculation and data collection**

For this study, we calculated a sample size of 20 participants for each group, with estimated 80% power to detect a change of 0.015 between the study endpoints of the hyperglycemics and normoglycemics groups at 5% level of significance. A 20% loss due to early withdrawals and non-evaluable measurements was assumed and, combined with the effect of stratification on analysis, resulted in the requirement to recruit at least 20 patients per treatment group.

Moreover, the authors collected the data prospectively from electronic medical records that were used in clinical settings at participants' Institutions. Then, we adopted electronic systems for data capture, collection, and monitoring, with on-site and real time data entry. Finally, after collecting the patients' files, all data were analyzed.

## Statistical analysis

The distribution of values was assessed using Shapiro-Wilks test and the homogeneity of variance using Levene's test. Continuous variables were expressed as means and standard deviations and were tested by a two-tailed Student t-test or Mann–Whitney U test as appropriate. A one-way analysis of variance (ANOVA) was used for more than two independent groups of data. Categorical variables were compared between groups using  $\chi^2$  test or Fisher exact test where appropriate. Cox Regression analysis allowed to calculate in all study population (n=76) the independent predictors of HF event and death, and we calculated the hazard ratios (HR) with 95% confidence intervals. The model was evaluated with Hosmer and Lemeshow test. Survival analysis by the Kaplan Meier method was used to assess hyperglycemia's impact on HF events and death over a 24 month follow-up period. A 2-sided  $p < 0.05$  was considered statistically significant. All statistical analyses were performed using the SPSS software package for Windows 25.0 (SPSS Inc., Chicago, Illinois).

## Study limitations

In the present study the cohort's dimension could affect the clinical outcomes in patients with TTS, but it is due to the rarity of TTS. We did not assay the serum adrenaline. We mainly focused on serum norepinephrine values, and on norepinephrine heart uptake by the H/M<sub>late</sub> at 123I-MIBG, as main effector of sympathetic activity. Indeed, 123I-MIBG uses an analogous of norepinephrine (5). On other hand, 123I-MIBG was performed in a subset of 30 patients. Thus, hyperglycemia effects on cardiac adrenergic pathways and the inflammatory molecular/cellular axis should be deeply investigated. Moreover, we did not investigate HOMA-IR due to populations enrolled, the effects of acute stress, and high fasting plasma glucose level variations that could affect the result interpretation (13,14). Furthermore, due to the small number of diabetic patients, it is not possible to drive any definitive conclusions on the possible and independent effect of hyperglycemia

regardless of diabetes. Multicenter prospective adequately powered studies targeting a considerable number of diabetic patients are warranted.



## Reference

1. American Diabetes Association. Classification and Diagnosis of Diabetes. *Diabetes Care* 2017;40(Suppl 1):S11-S24.
2. Ghadri JR, Wittstein IS, Prasad A, Sharkey S, Dote K, Akashi YJ, Cammann VL, Crea F, Galiuto L, Desmet W, Yoshida T, Manfredini R, Eitel I, Kosuge M, Nef HM, Deshmukh A, Lerman A, Bossone E, Citro R, Ueyama T, Corrado D, Kurisu S, Ruschitzka F, Winchester D, Lyon AR, Omerovic E, Bax JJ, Meimoun P, Tarantini G, Rihal C, Y-Hassan S, Migliore F, Horowitz JD, Shimokawa H, Lüscher TF, Templin C. International Expert Consensus Document on Takotsubo Syndrome (Part II): Diagnostic Workup, Outcome, and Management. *Eur Heart J*. 2018 Jun 7;39(22):2047-2062.
3. Ghadri JR, Wittstein IS, Prasad A, Sharkey S, Dote K, Akashi YJ, Cammann VL, Crea F, Galiuto L, Desmet W, Yoshida T, Manfredini R, Eitel I, Kosuge M, Nef HM, Deshmukh A, Lerman A, Bossone E, Citro R, Ueyama T, Corrado D, Kurisu S, Ruschitzka F, Winchester D, Lyon AR, Omerovic E, Bax JJ, Meimoun P, Tarantini G, Rihal C, Y-Hassan S, Migliore F, Horowitz JD, Shimokawa H, Lüscher TF, Templin C. International Expert Consensus Document on Takotsubo Syndrome (Part I): Clinical Characteristics, Diagnostic Criteria, and Pathophysiology. *Eur Heart J* 2018 7;39(22):2032-2046.
4. Esposito K, Giugliano D. Mediterranean diet and type 2 diabetes. *Diabetes Metab Res Rev*. 2014 Mar;30 Suppl 1:34-40.
5. Marfella R, Barbieri M, Sardu C, et al. Effects of  $\alpha$ -lipoic acid therapy on sympathetic heart innervation in patients with previous experience of transient takotsubo cardiomyopathy. *Int. J Cardiol* 2016;67(2):153-61.
6. Patel SM, Lennon RJ, Prasad A. Regional wall motion abnormality in apical ballooning syndrome (Takotsubo/stress cardiomyopathy): importance of biplane left ventriculography

- for differentiating from spontaneously aborted anterior myocardial infarction. *Int J Cardiovasc Imaging* 2012;28(4):687-94.
7. Lang RM, Badano LP, Mor-Avi V, Afilalo J, Armstrong A, Ernande L, Flachskampf FA, Foster E, Goldstein SA, Kuznetsova T, Lancellotti P, Muraru D, Picard MH, Rietzschel ER, Rudski L, Spencer KT, Tsang W, Voigt JU. Recommendations for cardiac chamber quantification by echocardiography in adults: an update from the American Society of Echocardiography and the European Association of Cardiovascular Imaging. *Eur Heart J Cardiovasc Imaging*. 2015 Mar;16(3):233-70. doi: 10.1093/ehjci/jev014. Erratum in: *Eur Heart J Cardiovasc Imaging*. 2016 Apr;17(4):412.
  8. Sardu C, Paolisso P, Sacra C, et al. Effects of Metformin Therapy on Coronary Endothelial Dysfunction in Patients With Prediabetes With Stable Angina and Non obstructive Coronary Artery Stenosis: The CODYCE Multicenter Prospective Study. *Diabetes Care* 2019;42(10):1946-1955.
  9. Sardu C, Sacra C, Mauro C, Siniscalchi M, Marfella R, Rizzo MR. 123I-MIBG Scintigraphy in the Subacute State of Takotsubo Cardiomyopathy. *JACC Cardiovasc Imaging* 2017;10(1):93-94
  10. Sardu C, Paolisso G, Marfella R. Letter by Sardu et al Regarding Article, "Persistent Long-Term Structural, Functional, and Metabolic Changes After Stress-Induced (Takotsubo) Cardiomyopathy". *Circulation* 2018;138(9):954-955.
  11. Yancy CW, Jessup M, Bozkurt B, et al. 2017 ACC/AHA/HFSA Focused Update of the 2013 ACCF/AHA Guideline for the Management of Heart Failure: A Report of the American College of Cardiology/American Heart Association Task Force on Clinical Practice Guidelines and the Heart Failure Society of America. *J Am Coll. Cardiol* 2017;70(6):776-803.
  12. Ponikowski P, Voors AA, Anker SD, Bueno H, Cleland JGF, Coats AJS, Falk V, González-Juanatey JR, Harjola V-P, Jankowska EA, Jessup M, Linde C, Nihoyannopoulos P, Parissis JT,

- Pieske B, Riley JP, Rosano GMC, Ruilope LM, Ruschitzka F, Rutten FH, Meer P van der. 2016 ESC Guidelines for the diagnosis and treatment of acute and chronic heart failure: The Task Force for the diagnosis and treatment of acute and chronic heart failure of the European Society of Cardiology (ESC) Developed with the special contribution of the Heart Failure Association (HFA) of the ESC. *Eur Heart J* 2016;37:2129–2200.
13. Matthews DR, Hosker JP, Rudenski AS, Naylor BA, Treacher DF, Turner RC. Homeostasis model assessment: insulin resistance and beta-cell function from fasting plasma glucose and insulin concentrations in man. *Diabetologia*. 1985 Jul;28(7):412-9.
14. Pisprasert V, Ingram KH, Lopez-Davila MF, Munoz AJ, Garvey WT. Limitations in the use of indices using glucose and insulin levels to predict insulin sensitivity: impact of race and gender and superiority of the indices derived from oral glucose tolerance test in African Americans. *Diabetes Care*. 2013 Apr;36(4):845-53.

### **Supplemental Tables' legend.**

**Supplemental Table S1 .** SBP = systolic blood pressure; DBP = diastolic blood pressure; HR = heart rate; STEMI = ST-segment Elevation Myocardial Infarction; eGFR-CKDEPI: estimated Glomerular filtration rates-Chronic Kidney Disease Epidemiology Collaboration equation; CRP: C-reactive Protein; TNF- $\alpha$ : Tumor necrosis factor-alfa; BNP: Brain natriuretic peptide; Hb1Ac: glycosylated Hemoglobin, type A1C; LVEDV = left-ventricular-end- diastolic-volume; LVEDV = left-ventricular-end-systolic-volume; LVEF = left ventricular ejection fraction; DAPT: Dual Antiplatelet Therapy; ACEI: Angiotensin converting enzyme inhibitors; ARBs: Angiotensin II receptor blockers; CCB: calcium-channel blockers. \* is for statistical significance ( $p<0.05$ ) comparing hyperglycemics vs. normoglycemics.

**Supplemental Table S2.** BNP: B type natriuretic peptide; CI: confidence of interval; HR: Hazard ratio; LVEF: left ventricle ejection fraction; TNF- $\alpha$ : Tumor Necrosis Factor-alpha. \* is for statistical significance ( $p<0.05$ ).

**Supplemental Table S3.** CRP: C reactive protein; TNF- $\alpha$ : tumor necrosis factor-alpha; BNP: B type natriuretic peptide; Hb1Ac: glycosylated Hemoglobin, type A1C; CK: creatin kinase; eGFR-CKDEPI: estimated Glomerular filtration rates-Chronic Kidney Disease Epidemiology Collaboration equation. We had 3 deaths in hyperglycemics and 2 deaths in normoglycemics at 1 year of follow-up. \* is for statistical significance ( $p<0.05$ ) comparing hyperglycemics vs. normoglycemics.

**Supplemental Table S4.** CRP: C reactive protein; TNF- $\alpha$ : tumor necrosis factor-alpha;BNP: B type natriuretic peptide; Hb1Ac: glycosylated Hemoglobin, type A1C; CK: creatin kinase;eGFR-CKDEPI: estimated Glomerular filtration rates-Chronic Kidney Disease Epidemiology Collaboration

equation. At 2 years of follow-up, we have a total of 7 vs. 4 deaths ( $p < 0.05$ ) comparing hyperglycemics vs. normoglycemics. \* is for statistical significance ( $p < 0.05$ ) comparing hyperglycemics vs. normoglycemics.

## Supplemental Tables

**Supp. Table S1: Demographic characteristics, co-morbidities, clinical-laboratory-instrumental findings and medical therapy of TakoTsubo patients at baseline, according to glycemic levels.**

|                                    | Overall<br>N = 76 | Hyperglycemics<br>N = 28 | Normoglycemics<br>N = 48 | p-value |
|------------------------------------|-------------------|--------------------------|--------------------------|---------|
| Age, years                         | 67.5±11.1         | 70.6±7.9                 | 66.6±12.2                | 0.057   |
| Female sex, n (%)                  | 46 (60.5)         | 25 (89.3)                | 41 (85.4)                | 0.737   |
| BMI Kg/m <sup>2</sup>              | 27.6±4.2          | 28.3±4.9                 | 26.4±4.9                 | 0.264   |
| <b>Cardiovascular risk factors</b> |                   |                          |                          |         |
| Current smoking, n (%)             | 35 (46.1)         | 13 (46.4)                | 22 (45.8)                | 0.574   |
| Hypertension, n (%)                | 11 (14.4)         | 4 (14.3)                 | 7 (14.6)                 | 0.088   |
| Dyslipidemia, n (%)                | 9 (11.8)          | 4 (14.3)                 | 5 (10.4)                 | 0.464   |
| Type-2 diabetes mellitus, n (%)    | 18 (23.7)         | 11 (39.3)                | 7 (14.6)                 | 0.024*  |
| <b>Admission Medical Therapy</b>   |                   |                          |                          |         |
| Anti-platelets, n (%)              | 15 (19.7)         | 6 (21.4)                 | 9 (18.7)                 | 0.77    |
| DAPT, n (%)                        | 0 (0)             | 0 (0)                    | 0 (0)                    | 0.99    |
| Vitamin K antagonist, n (%)        | 0 (0)             | 0 (0)                    | 0 (0)                    | 0.99    |
| New oral anticoagulants, n (%)     | 3 (3.9)           | 2 (7.1)                  | 1 (2.1)                  | 0.27    |
| Beta-blockers, n (%)               | 18 (23.7)         | 7 (25)                   | 11 (22.9)                | 0.83    |
| ACEi, n (%)                        | 21 (27.6)         | 4 (14.2)                 | 15 (31.2)                | 0.1     |
| ARBs, n (%)                        | 13 (17.1)         | 5 (17.8)                 | 4 (8.3)                  | 0.21    |
| CCBs, n (%)                        | 12 (15.8)         | 6 (21.4)                 | 6 (12.5)                 | 0.3     |
| Statins, n (%)                     | 10 (13.1)         | 3 (10.7)                 | 7 (14.6)                 | 0.63    |
| Loop diuretics, n (%)              | 3 (3.9)           | 1 (3.5)                  | 2 (4.2)                  | 0.63    |
| Thiazide diuretics, n (%)          | 13 (17.1)         | 6 (21.4)                 | 7 (14.6)                 | 0.44    |
| Diet Therapy, n (%)                | 11 (14.5)         | 6 (21.4)                 | 5 (10.4)                 | 0.18    |
| Oral hypoglycemic agents, n (%)    | 7 (9.2)           | 5 (17.2)                 | 2 (4.2)                  | 0.046*  |
| Metformin, n (%)                   | 5 (71.4)          | 4 (80)                   | 1 (50)                   |         |
| Insulin secretagoges, n (%)        | 2 (28.6)          | 1 (20)                   | 1 (50)                   |         |
| Insulin Therapy, n (%)             | 0 (0)             | 0 (0)                    | 0 (0)                    | 0.99    |

|                                      |                |                |                |        |
|--------------------------------------|----------------|----------------|----------------|--------|
| <b>Clinical presentation</b>         |                |                |                |        |
| SBP, mmHg                            | 122.5±25.9     | 120.8±26.5     | 123.5±24.3     | 0.279  |
| DBP, mmHg                            | 77.5±15.9      | 68.3±13.7      | 77.1±15.6      | 0.150  |
| HR (bpm)                             | 92.4±17.1      | 92.9±19.8      | 90.1±15.5      | 0.852  |
| Chest pain, n (%)                    | 25 (32.9)      | 9 (32.1)       | 16 (33.3)      | 0.561  |
| Stressfull event, n (%)              |                |                |                |        |
| Emotional, n (%)                     | 23 (30.2)      | 7 (25)         | 16 (33.3)      | 0.606  |
| Physical, n (%)                      | 34 (44.7)      | 16 (57.1)      | 18 (37.5)      | 0.151  |
| Killip-class II-IV, n (%)            | 14 (18.4)      | 8 (28.6)       | 6 (12.5)       | 0.08   |
| STEMI, n (%)                         | 45 (59.2)      | 19 (67.9)      | 26 (54.2)      | 0.24   |
| <b>Angiographic Results</b>          |                |                |                | 0.48   |
| Smooth coronary artery, n (%)        | 55 (72.4)      | 18 (64.3)      | 37 (77.1)      |        |
| Non-obstructive CAD, n (%)           | 19 (25)        | 9 (32.1)       | 10 (20.8)      |        |
| Obstructive CAD, n (%)               | 2 (2.6)        | 1 (3.6)        | 1 (2.1)        |        |
| <b>Laboratory data</b>               |                |                |                |        |
| Leukocytes, n                        | 10850±866      | 11067±398      | 9751±409       | 0.379  |
| Neutrophyles, n                      | 7377±1134      | 7878±1073      | 7088±1080      | 0.014* |
| Platelets, n X 10 <sup>3</sup>       | 272.75±7.73    | 282.01±8.05    | 267.35±7.57    | 0.429  |
| CRP, mg/dl                           | 2.38±0.33      | 3.71±0.89      | 2.01±0.26      | 0.007* |
| TNF-α, pg/ml                         | 5.04±0.96      | 5.69±0.90      | 4.67±0.75      | 0.001* |
| BNP, pd/ml                           | 1178±651       | 1678±644       | 886±450        | 0.001* |
| Glycemia, mmol/L                     | 7.16±2.13      | 9.52±1.54      | 5.78±0.75      | 0.001* |
| HbA1c, mmol/L                        | 32.69±1.31     | 33.15±3.36     | 32.41±1.40     | 0.817  |
| Peak Troponin I, ng/L                | 28.65±3.57     | 30.99±8.13     | 27.28±4.48     | 0.665  |
| Peak CK, UI/L                        | 198.6±13.7     | 186.1±27.5     | 205.4±20.3     | 0.575  |
| Creatinine, mg/dL                    | 0.84±0.27      | 0.88±0.27      | 0.81±0.27      | 0.323  |
| eGFR_CKDEPI,                         | 77.55±21.68    | 71.84±21.94    | 80.87±21.03    | 0.080  |
| Norepinephrine, pg/ml                | 2047.78±428.08 | 2192.39±469.53 | 1963.41±382.16 | 0.023* |
| <b>Trans-thoracic echocardiogram</b> |                |                |                |        |
| LVEDV, mm                            | 52.1±9.7       | 52.2±9.8       | 52.1±7.5       | 0.329  |

|                                  |           |            |           |        |
|----------------------------------|-----------|------------|-----------|--------|
| LVEF, %                          | 40±9      | 35±8       | 42±9      | 0.011* |
| LVEF at hospital discharge       | 46±10     | 43±8       | 49±11     | 0.021* |
| Mitral reflux                    |           |            |           | 0.54   |
| 1, n (%)                         | 43 (56.6) | 15 (53.6)  | 28 (58.3) |        |
| 2, n (%)                         | 28 (36.8) | 10 (35.7)  | 18 (37.5) |        |
| 3 n (%)                          | 5 (6.6)   | 3 (10.7)   | 2 (4.2)   |        |
| <b>Discharge Medical Therapy</b> |           |            |           |        |
| Anti-platelets, n (%)            | 31 (40.8) | 13 (46.4)  | 18 (37.5) | 0.477  |
| DAPT, n (%)                      | 4 (5.3)   | 2 (7.1)    | 2 (4.2)   | 0.623  |
| Vitamin K antagonist, n (%)      | 2 (2.6)   | 1 (3.6)    | 1 (2.1)   | 0.632  |
| New oral anticoagulants, n (%)   | 2 (2.6)   | 1 (3.6)    | 1 (2.1)   | 0.632  |
| Beta-blockers, n (%)             | 26 (34.2) | 9 (32.1)   | 17 (35.4) | 0.808  |
| ACEi, n (%)                      | 31 (40.8) | 10 (35.7%) | 21 (43.8) | 0.629  |
| ARBs, n (%)                      | 12 (15.8) | 4 (14.3)   | 8 (16.7)  | 0.528  |
| CCBs, n (%)                      | 15 (19.7) | 6 (21.4)   | 9 (19.1)  | 0.517  |
| Statins, n (%)                   | 22 (28.9) | 8 (28.6)   | 14 (29.2) | 0.585  |
| Loop diuretics, n (%)            | 3 (3.9)   | 1 (3.6)    | 2 (4.2)   | 0.695  |
| Thiazide diuretics, n (%)        | 9 (11.8)  | 4 (21.1)   | 5 (15.2)  | 0.708  |
| Diet therapy, n (%)              | 6 (7.9)   | 2 (7.1)    | 4 (8.3)   | 0.85   |
| Oral hypoglycemic agents, n (%)  | 8 (10.5)  | 7 (25)     | 1 (2.1)   | 0.015* |
| Metformin, n (%)                 | 6 (75)    | 5 (71.4)   | 1 (100)   |        |
| Insulin secretagoges, n (%)      | 2 (25)    | 2 (28.6)   | 0 (0)     |        |
| Insulin therapy, n (%)           | 4 (5.2)   | 2 (7.1)    | 2 (4.2)   | 0.57   |



**Supp. Table S2. Cox Regression analyses for Heart failure (HF) and deaths at 24 months of follow-up.**

|                |       | MULTIVARIATE<br>ANALYSIS FOR<br>HF |         |       | MULTIVARIATE<br>ANALYSIS FOR<br>DEATHS |         |
|----------------|-------|------------------------------------|---------|-------|----------------------------------------|---------|
| Risk factors   | HR    | CI 95%                             | p value | HR    | CI 95%                                 | p value |
| BNP            | 1.000 | 0.999-1.001                        | 0.306   | 1.000 | 0.999-1.001                            | 0.951   |
| Hyperglycemia  | 1.010 | 1.003-1.018                        | 0.008*  | 1.016 | 1.001-1.031                            | 0.031*  |
| LVEF           | 0.967 | 0.934-1.002                        | 0.065   | 0.992 | 0.923-1.066                            | 0.820   |
| TNF-α          | 1.775 | 1.256-2.510                        | 0.001*  | 1.736 | 0.856-3.521                            | 0.126   |
| Norepinephrine | 1.001 | 1.000-1.001                        | 0.035*  | 1.000 | 0.998-1.001                            | 0.627   |

**Supp. Table S3: Clinical evaluation and laboratory findings of TakoTsubo patients at 1 year of follow-up.**

|                                | Overall<br>N = 71 | Hyperglycemics<br>N = 25 | Normoglycemics<br>N = 46 | p-value |
|--------------------------------|-------------------|--------------------------|--------------------------|---------|
| <b>Clinical evaluation</b>     |                   |                          |                          |         |
| Systolic blood pressure, mmHg  | 128.5±27.9        | 126.8±32.5               | 129.4±25.1               | 0.698   |
| Diastolic blood pressure, mmHg | 79.5±15.9         | 68.3±13.7                | 80.1±15.6                | 0.641   |
| Heart rate (bpm)               | 72.9±9.9          | 74.9±9.6                 | 71.6±10.5                | 0.145   |
| NYHA class I-II, (%)           | 69 (97.2)         | 24 (96)                  | 45 (97.8)                | 0.65    |
| <b>Laboratory data</b>         |                   |                          |                          |         |
| Leukocytes, n                  | 9598±825          | 9852±398                 | 9108±409                 | 0.321   |
| Neutrophiles, n                | 6589±821          | 6895±789                 | 6241±843                 | 0.322   |
| Platelets, n X 10 <sup>3</sup> | 226.41±7.37       | 226.39±7.53              | 228.45±7.18              | 0.243   |
| CRP, mg/ml                     | 1.81±0.45         | 2.56±0.59                | 1.08±0.31                | 0.005*  |
| TNF-α, pg/ml                   | 3.61±0.74         | 4.11±0.86                | 2.83±0.65                | 0.005*  |
| BNP, pg/ml                     | 145±36            | 151±43                   | 142±29                   | 0.142   |
| Glycemia, mmol/L               | 6.27±1.58         | 7.04±1.98                | 5.83±0.84                | 0.005*  |
| HbA1c, mmol/L                  | 32.19±1.15        | 32.52±1.36               | 31.89±1.22               | 0.602   |
| Creatinine, mg/dL              | 0.81±0.21         | 0.82±0.22                | 0.79±0.24                | 0.089   |
| eGFR_CKDEPI,                   | 80.48±28.41       | 84.61±25.21              | 88.87±23.11              | 0.123   |
| Norepinephrine, pg/ml          | 1273.28±208.19    | 1583.33±251.13           | 971.22±162.25            | 0.042*  |
| <b>Medical Therapy</b>         |                   |                          |                          |         |
| Anti-platelets, n (%)          | 24 (33.8)         | 9 (36)                   | 15 (32.6)                | 0.77    |
| Vitamin K antagonist, n (%)    | 3 (4.22)          | 2 (8)                    | 1 (2.17)                 | 0.24    |
| New oral anticoagulants, n (%) | 4 (5.63)          | 2 (8)                    | 2 (4.35)                 | 0.52    |
| Beta-blockers, n (%)           | 23 (32.4)         | 9 (36)                   | 14 (30.43)               | 0.63    |
| ACEi, n (%)                    | 29 (40.8)         | 11 (44)                  | 18 (39.13)               | 0.68    |
| ARBs, n (%)                    | 11 (15.5)         | 5 (20)                   | 6 (13.04)                | 0.44    |
| CCBs, n (%)                    | 10 (14.1)         | 4 (16)                   | 6 (13.04)                | 0.73    |
| Statins, n (%)                 | 19 (26.76)        | 7 (28)                   | 12 (26.1)                | 0.86    |
| Loop diuretics, n (%)          | 9 (12.7)          | 4 (16)                   | 5 (10.87)                | 0.53    |
| Thiazide diuretics, n (%)      | 6 (8.5)           | 3 (12)                   | 3 (6.52)                 | 0.42    |

|                                 |          |          |          |        |
|---------------------------------|----------|----------|----------|--------|
| Diet therapy, n (%)             | 4 (5.63) | 1 (4)    | 3 (6.52) | 0.65   |
| Oral hypoglycemic agents, n (%) | 7 (9.86) | 6 (24)   | 1 (2.17) | 0.003* |
| Metformin, n (%)                | 6 (85.7) | 5 (83.3) | 1 (100)  |        |
| Insulin secretagogues, n (%)    | 1 (14.3) | 1 (16.7) | 0 (0)    |        |
| Insulin therapy, n (%)          | 3 (4.22) | 1 (4)    | 2 (4.4)  | 0.94   |

**Supp. Table S4: Clinical evaluation and laboratory findings of TakoTsubo patients at 2 year of follow-up.**

|                                | <b>Overall</b> | <b>Hyperglycemics</b> | <b>Normoglycemics</b> | <b>p-value</b> |
|--------------------------------|----------------|-----------------------|-----------------------|----------------|
|                                | <b>N = 65</b>  | <b>N = 21</b>         | <b>N = 44</b>         |                |
| <b>Clinical evaluation</b>     |                |                       |                       |                |
| Systolic blood pressure, mmHg  | 127.9±28.2     | 129.8±26.6            | 128.4±24.1            | 0.502          |
| Diastolic blood pressure, mmHg | 78.6±14.3      | 78.2±13.8             | 79.7±15.1             | 0.135          |
| Heart rate (bpm)               | 74.1±9.3       | 75.1±9.9              | 73.6±10.1             | 0.231          |
| NYHA class I-II, (%)           | 63 (96.9)      | 20 (95.2)             | 43 (97.7)             | 0.58           |
| <b>Laboratory data</b>         |                |                       |                       |                |
| Leukocytes, n                  | 9257±483       | 9482±552              | 9128±404              | 0.582          |
| Neutrophyles, n                | 6499±802       | 6698±779              | 6202±821              | 0.402          |
| Platelets, n X 10 <sup>3</sup> | 225.89±7.19    | 226.97±7.22           | 227.69±7.18           | 0.302          |
| CRP, mg/dl                     | 1.77±0.38      | 2.45±0.41             | 1.07±0.35             | 0.005*         |
| TNF-α, pg/ml                   | 3.56±0.71      | 4.06±0.81             | 2.78±0.62             | 0.005*         |
| BNP, pg/ml                     | 146±35         | 150±41                | 143±28                | 0.156          |
| Glycemia, mmol/L               | 6.15±1.46      | 6.91±1.74             | 5.71±0.78             | 0.005*         |
| HbA1c, mmol/L                  | 32.72±1.16     | 33.01±1.39            | 32.49±1.24            | 0.128          |
| Creatinine, mg/dL              | 0.82±0.20      | 0.83±0.25             | 0.80±0.19             | 0.103          |
| eGFR_CKDEPI,                   | 80.23±28.16    | 84.36±24.97           | 88.62±22.89           | 0.084          |
| Norepinephrine,pg/ml           | 1295.49±212.33 | 1651.33±260.41        | 992.33±168.22         | 0.031*         |
| <b>Medical Therapy</b>         |                |                       |                       |                |
|                                | 65             | 21                    | 44                    |                |
| Anti-platelets, n (%)          | 20 (30.8)      | 8 (38.1)              | 12 (27.3)             | 0.38           |
| Vitamin K antagonist, n (%)    | 2 (3.1)        | 1 (4.76)              | 1 (2.3)               | 0.59           |
| New oral anticoagulants, n (%) | 5 (7.7)        | 3 (14.3)              | 2 (4.5)               | 0.17           |
| Beta-blockers, n (%)           | 25 (38.5)      | 10 (47.6)             | 15 (34.1)             | 0.29           |
| ACEi, n (%)                    | 27 (41.5)      | 10 (47.6)             | 17 (38.6)             | 0.49           |
| ARBs, n (%)                    | 10 (15.4)      | 4 (19)                | 6 (13.6)              | 0.56           |
| CCBs, n (%)                    | 8 (12.3)       | 3 (14.3)              | 5 (11.4)              | 0.74           |
| Statins, n (%)                 | 17 (26.2)      | 6 (28.6)              | 11 (25)               | 0.76           |
| Loop diuretics, n (%)          | 12 (18.5)      | 7 (33.3)              | 5 (11.4)              | 0.032*         |

|                                 |          |          |         |        |
|---------------------------------|----------|----------|---------|--------|
| Thiazide diuretics, n (%)       | 4 (6.15) | 2 (9.5)  | 2 (4.5) | 0.43   |
| Diet therapy, n (%)             | 3 (4.6)  | 1 (4.8)  | 2 (4.5) | 0.97   |
| Oral hypoglycemic agents, n (%) | 9 (13.8) | 7 (33.3) | 2 (4.5) | 0.001* |
| Metformin, n (%)                | 7 (77.8) | 6 (85.7) | 1 (50)  |        |
| Insulin secretagoges, n (%)     | 2 (22.2) | 1 (14.3) | 1 (50)  |        |
| Insulin therapy, n (%)          | 4 (6.15) | 2 (9.5)  | 2 (4.5) | 0.43   |
